# Supplementary material for: Phytochemical Investigation of Myrcianthes cisplatensis: Structural Characterization of New p-Coumaroyl Alkylphloroglucinols and Antimicrobial Evaluation against Staphylococcus aureus
Source: MDPI journal article supplement (doi:10.3390/plants12051046), 2023-02-24

**Figure S1: NOESY experiment of compound 1.**

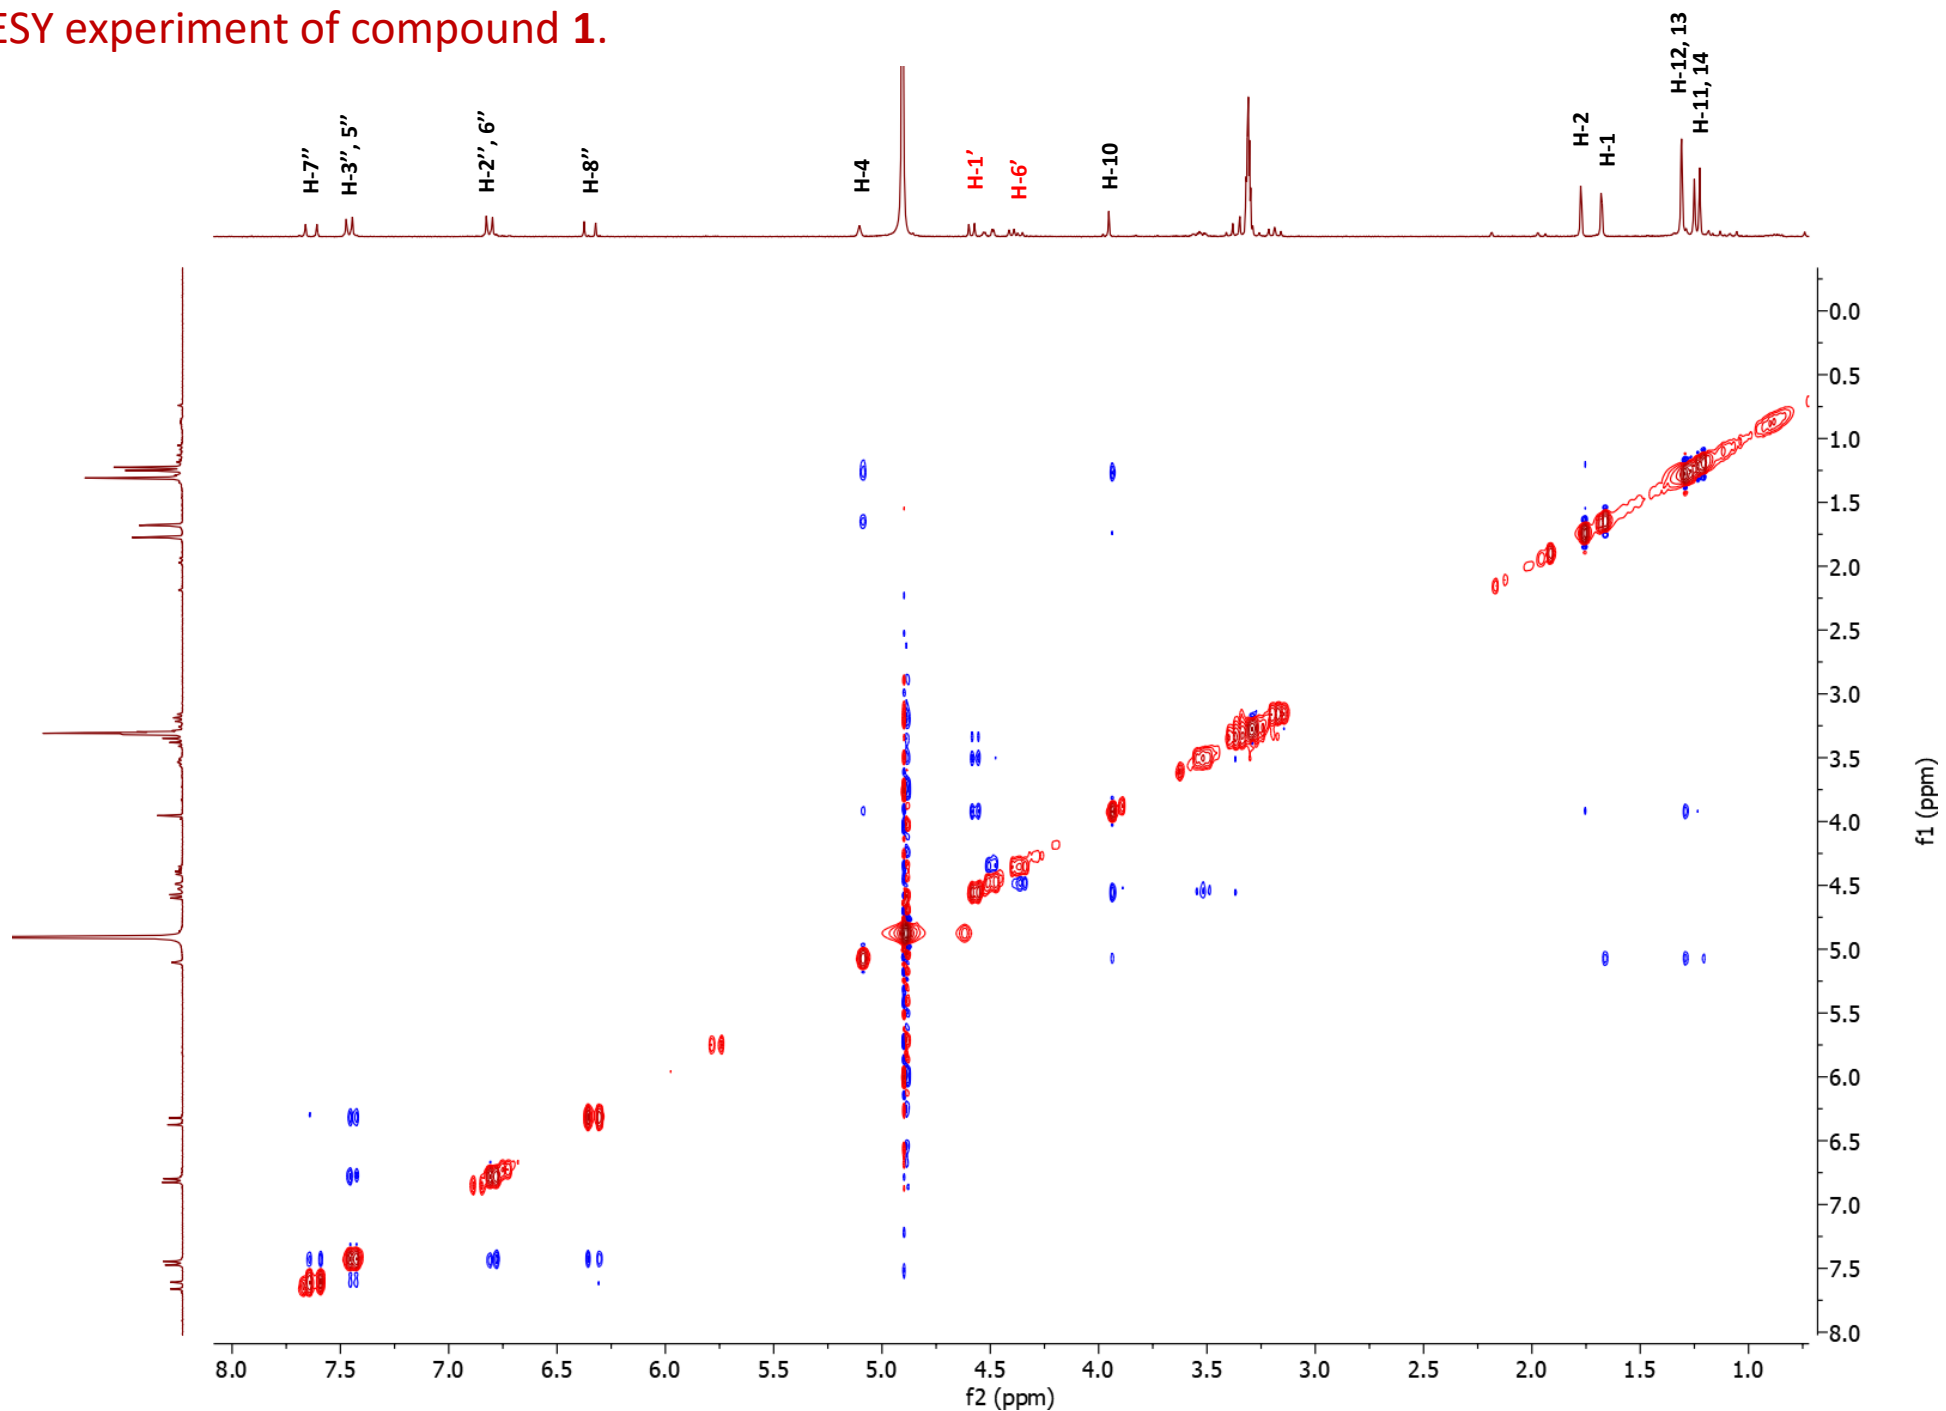

Figure S2: HMBC experiment of compound 3.

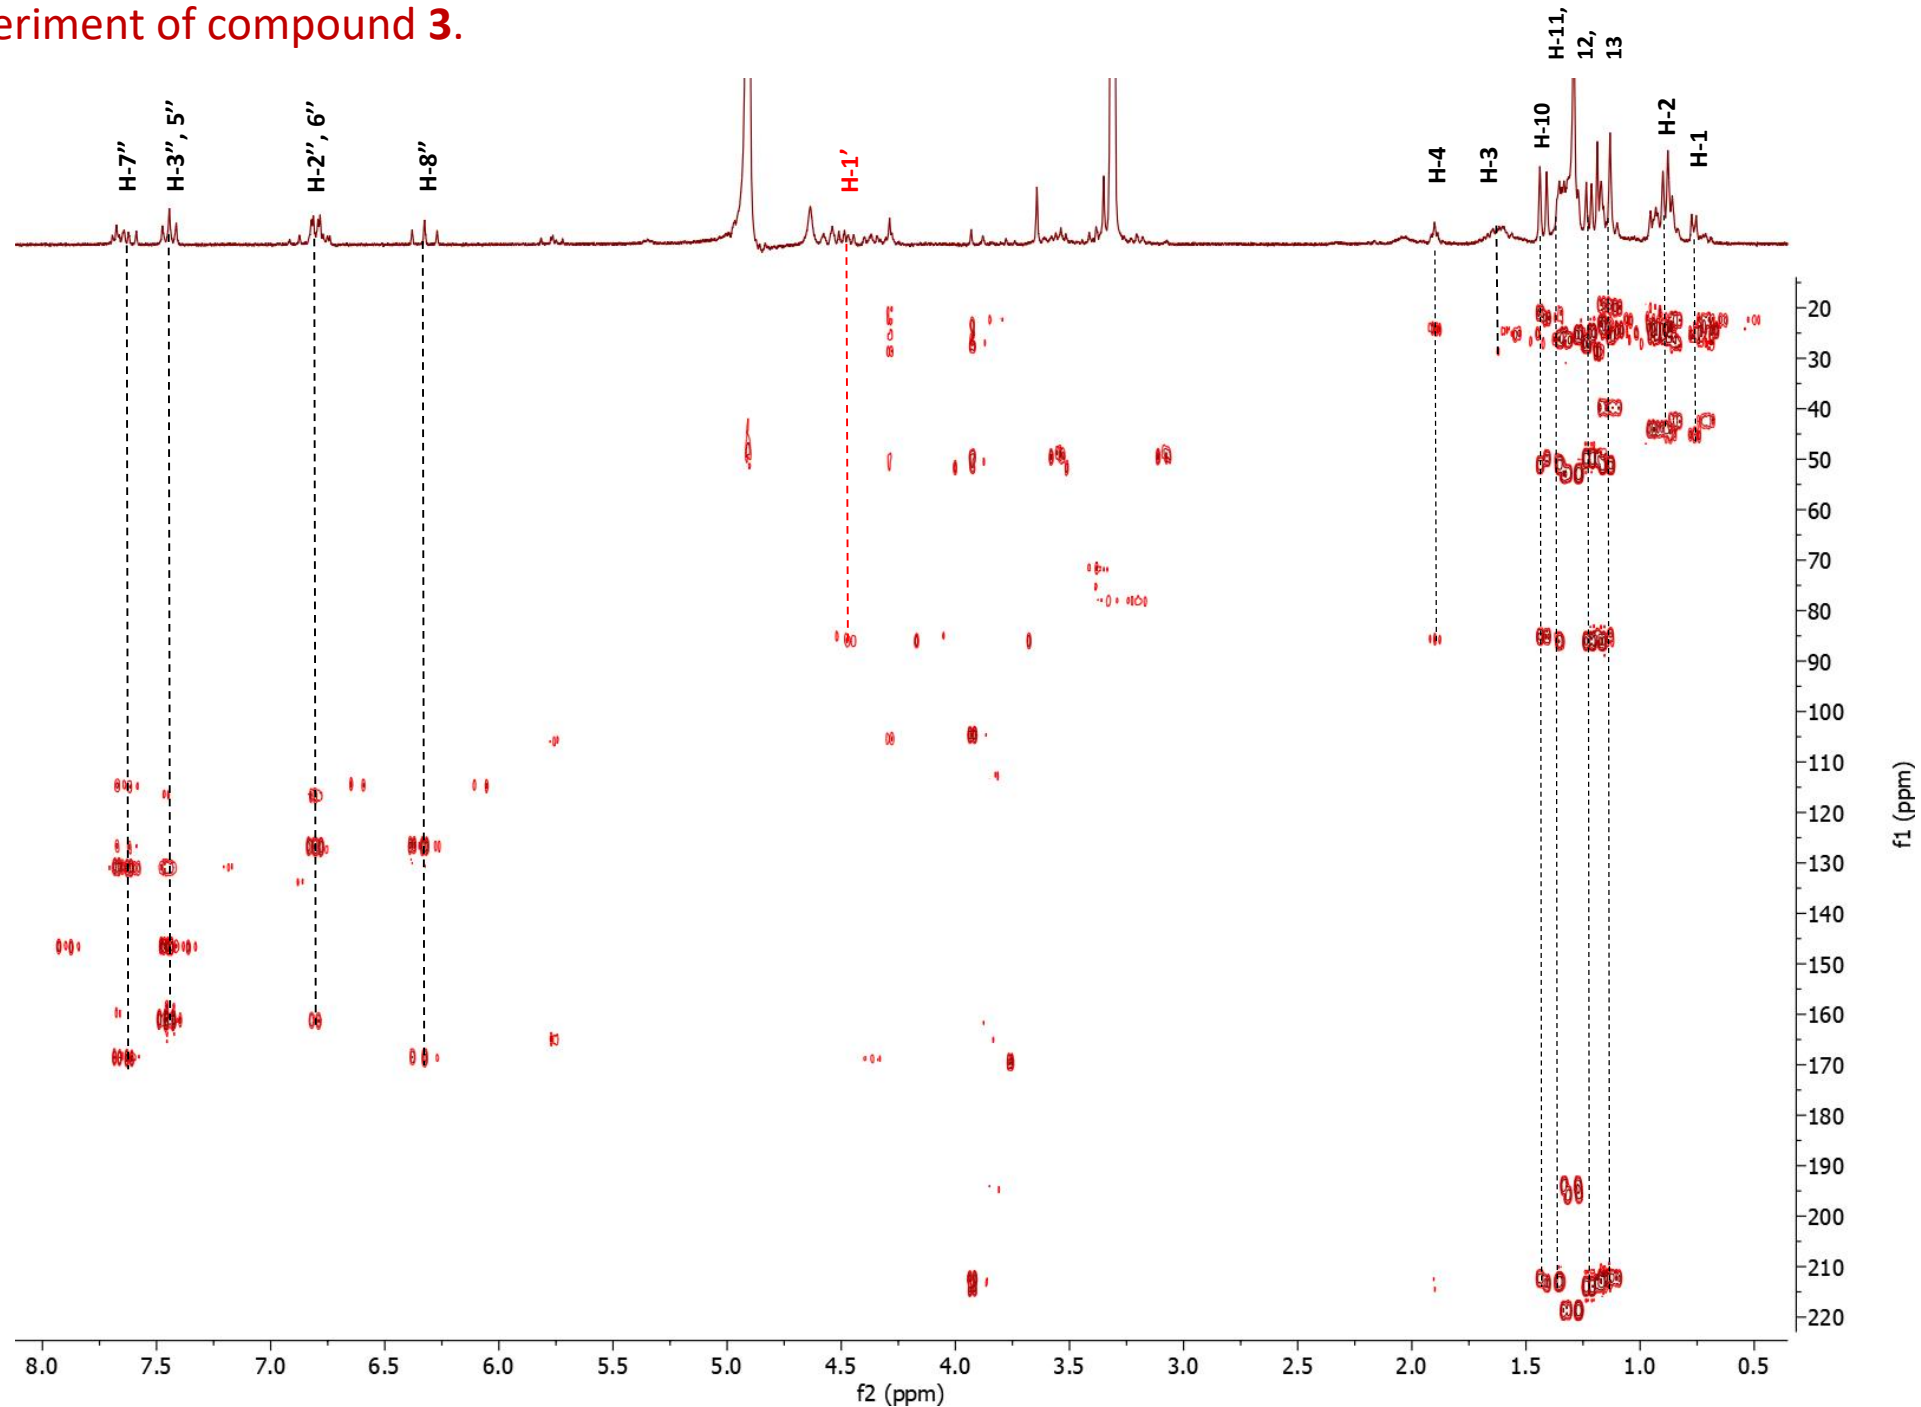

**Figure S3, Panel A: 2D-NMR elucidation of MYR\_A: HSQC experiment.**

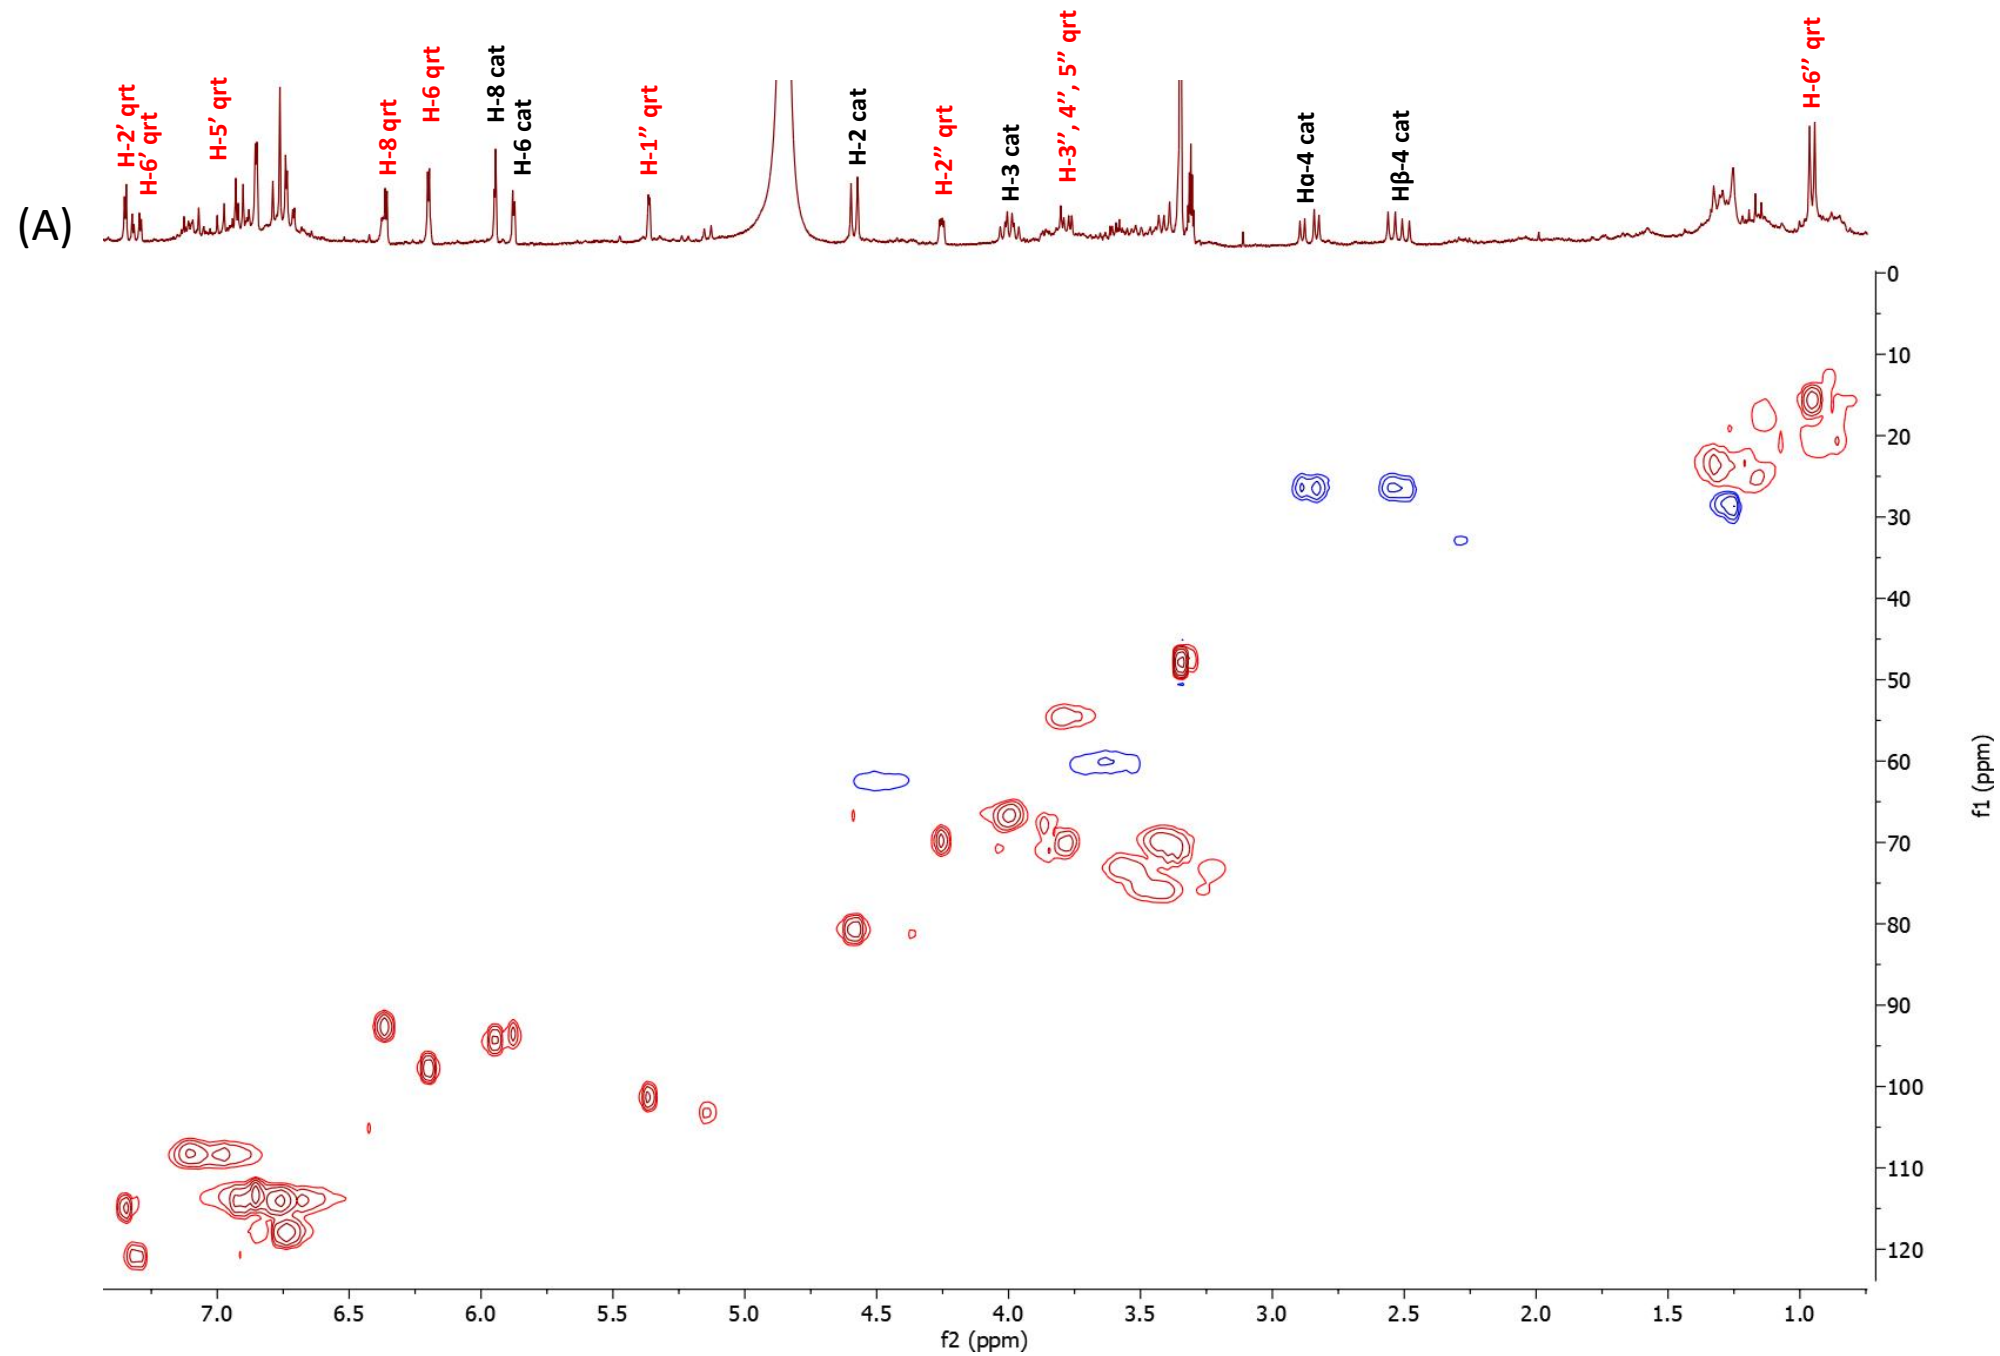

**Figure S3, Panel B: 2D-NMR elucidation of MYR\_A: HMBC experiment.**

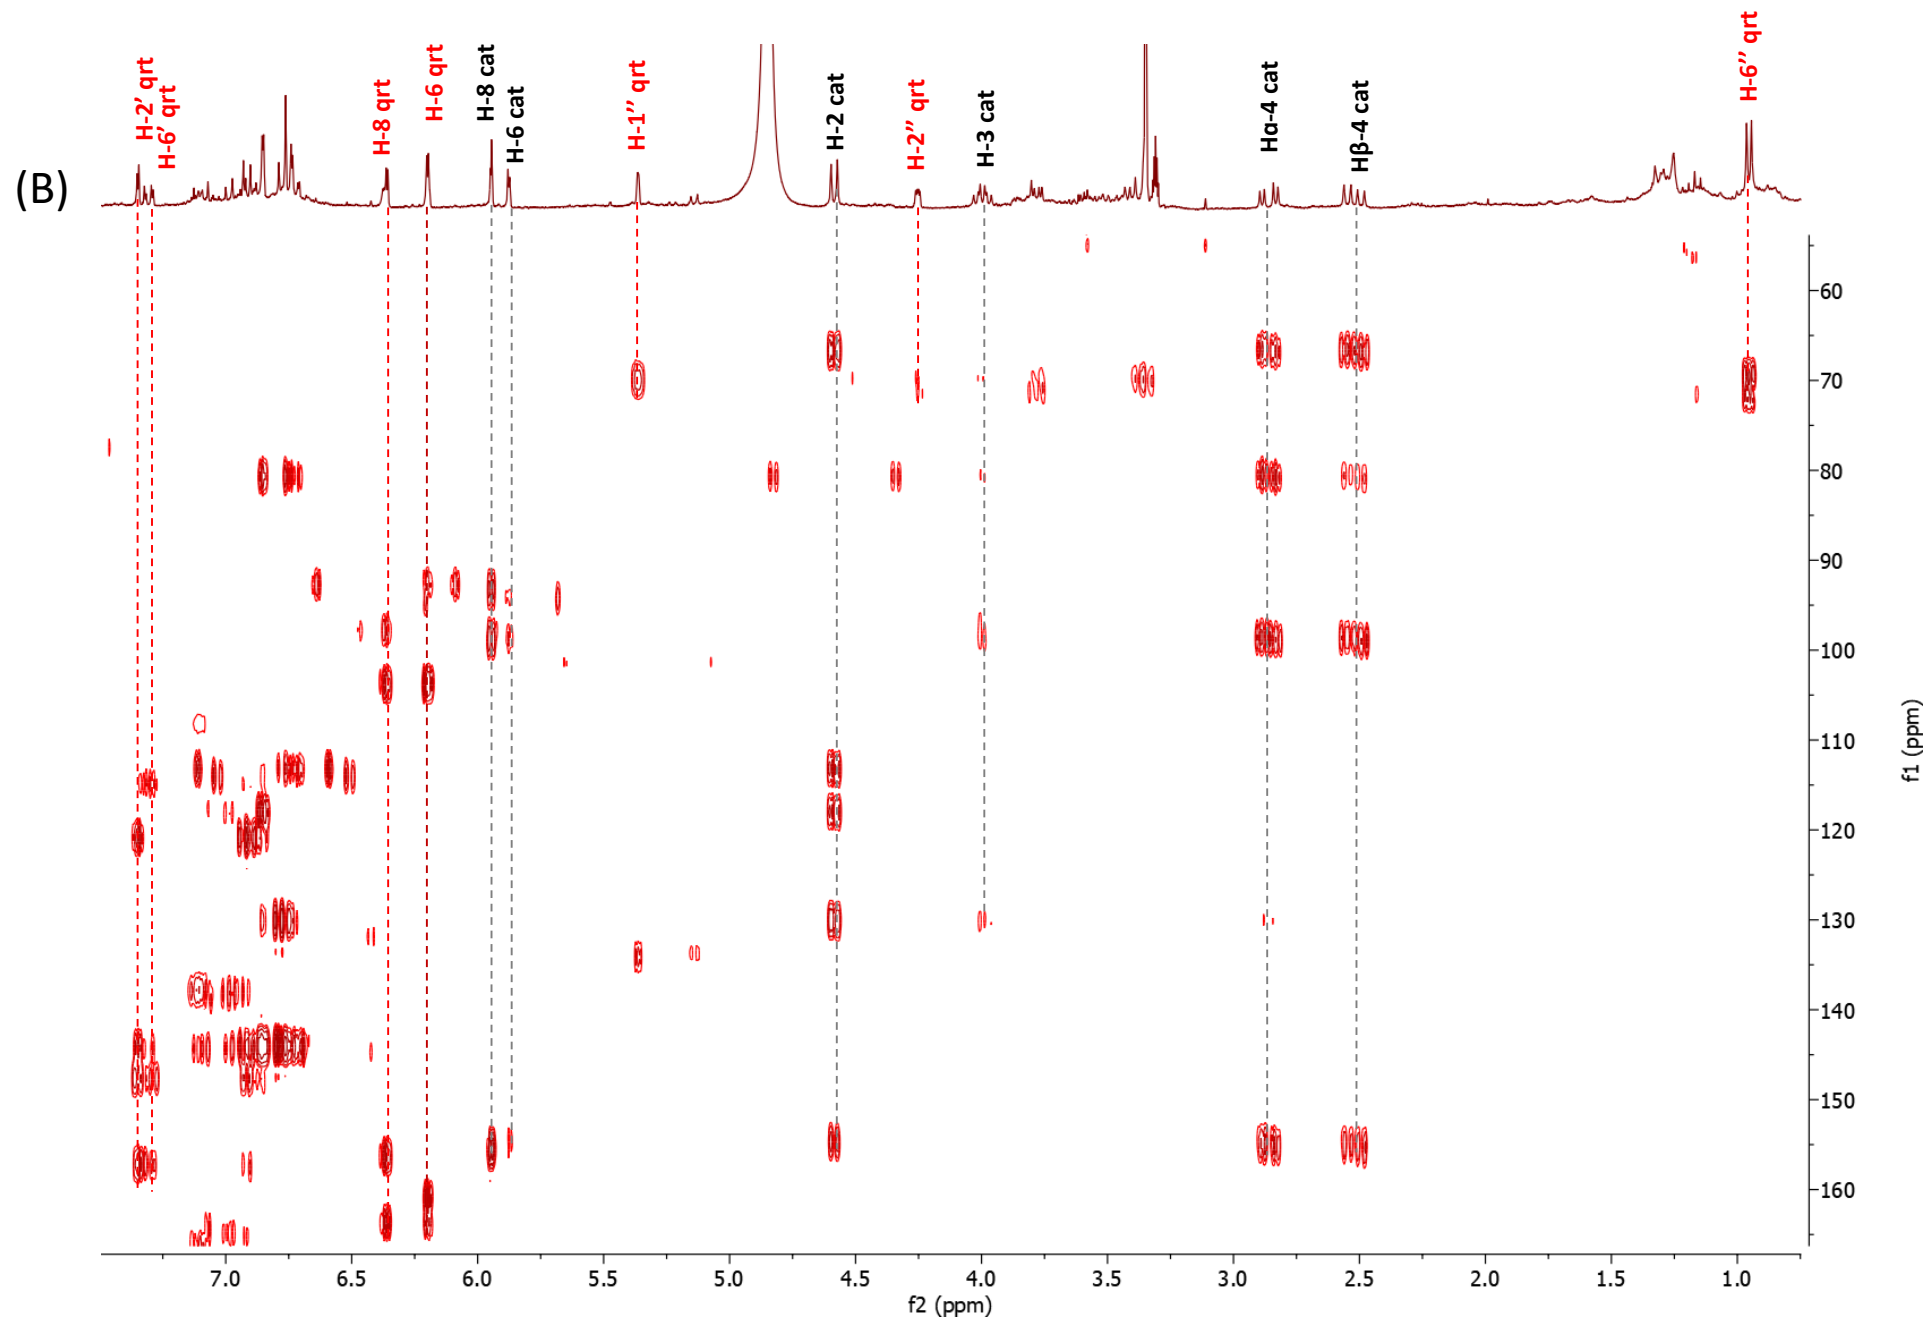

Supplement: s1 [file s1]
